# Supplementary material
Source: Springer Nature journal article supplement (https://www.springermedizin.de/resource/supplementary/12889_2011_4298_MOESM2_ESM.pdf/9492392)
Supplement: MOESM2 [file 9492392]

**202** Invited employees (8 Males, 194 Females)

**158** Returned screening questionnaires

41 Non-concenters  
13 Left the company  
3 long term sick  
1 Pregnant

**Baseline test**

**144** Consenters (Randomly allocated)

**120** Questionnaires

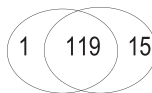

**134** Physical tests

76 Participants in intervention cluster-groups

68 Participants in reference cluster-groups

**46 Excluded**  
41 Normal Weights  
from analysis

**86** Questionnaires

**98** Target group

**94** Physical tests

54 Participants in intervention cluster-groups

44 Participants in reference cluster-groups

**7 Drop-outs**  
5 Left the compagny  
2 Long term sick

**91** Participants round 2

**78** Questionnaires

**87** Physical tests

53 Participants in intervention cluster-groups

38 Participants in reference cluster-groups

**8 Drop-outs**  
3 Left the compagny  
2 Withdrew  
3 Long term sick

**83** Participants round 3

**80** Questionnaires

**82** Physical tests

47 Participants in intervention cluster-groups

36 Participants in reference cluster-groups
